# Supplementary material
Source: MDPI journal article supplement (https://www.mdpi.com/2073-4433/13/9/1470)
Supplement: s1 [file s1]

## Supplementary Materials:

Claudia Falzone \* and Anne-Claude Romain

Table S1. The scales of air quality indices: USA, EU, and Belgium (BeIAQI).

| U.S. AQI                       |                                     |                         |                         |                                      |                                      |                       |           |
|--------------------------------|-------------------------------------|-------------------------|-------------------------|--------------------------------------|--------------------------------------|-----------------------|-----------|
| AQI Categories                 | O <sub>3</sub> (ppm)                |                         | PM (µg/m <sup>3</sup> ) |                                      | NO <sub>2</sub> (ppb)                | SO <sub>2</sub> (ppb) | CO (ppm)  |
|                                | (8-h)                               | (1-h)                   | 2.5 (24-h)              | 10 (24-h)                            | (1-h)                                | (1-h)                 | (8-h)     |
| Good                           | 0–0.054                             |                         | 0–12.0                  | 0–54                                 | 0–53                                 | 0–35                  | 0–4.4     |
| Moderate                       | 0.055–0.070                         |                         | 12.1–35.4               | 55–154                               | 54–100                               | 36–75                 | 4.5–9.4   |
| Unhealthy for Sensitive Groups | 0.071–0.085                         | 0.125–0.164             | 35.5–55.4               | 155–254                              | 101–360                              | 76–185                | 9.5–12.4  |
| Unhealthy                      | 0.086–0.105                         | 0.165–0.204             | 55.5–150.4              | 255–354                              | 361–649                              | 186–304               | 12.5–15.4 |
| Very Unhealthy                 | 0.106–0.200                         | 0.205–0.404             | 150.5–250.4             | 355–424                              | 650–1249                             | 305–604 (24-h)        | 15.5–30.4 |
| Hazardous                      | -                                   | 0.405–0.604             | 250.5–500.4             | 425–604                              | 1250–2049                            | 605–1004 (24-h)       | 30.5–50.4 |
| EU AQI                         |                                     |                         |                         |                                      |                                      |                       |           |
| AQI Categories                 | O <sub>3</sub> (µg/m <sup>3</sup> ) | PM (µg/m <sup>3</sup> ) |                         | NO <sub>2</sub> (µg/m <sup>3</sup> ) | SO <sub>2</sub> (µg/m <sup>3</sup> ) |                       |           |
|                                | Max (24-h)                          | 2.5 (24-h)              | 10 (24-h)               | Max (24-h)                           | Max (24-h)                           |                       |           |
| Good                           | 0–50                                | 0–10                    | 0–20                    | 0–40                                 | 0–100                                |                       |           |
| Fair                           | 50–100                              | 10–20                   | 20–40                   | 40–90                                | 100–200                              |                       |           |
| Moderate                       | 100–130                             | 20–25                   | 40–50                   | 90–120                               | 200–350                              |                       |           |
| Poor                           | 130–240                             | 25–50                   | 50–100                  | 120–230                              | 350–500                              |                       |           |
| Very poor                      | 240–380                             | 50–75                   | 100–150                 | 230–340                              | 500–750                              |                       |           |
| Extremely poor                 | >380                                | >75                     | >150                    | >340                                 | >750                                 |                       |           |
| BeIAQI                         |                                     |                         |                         |                                      |                                      |                       |           |
| AQI Categories                 | O <sub>3</sub> (µg/m <sup>3</sup> ) | PM (µg/m <sup>3</sup> ) |                         | NO <sub>2</sub> (µg/m <sup>3</sup> ) |                                      |                       |           |
|                                | Max (24-h)                          | 2.5 (24-h)              | 10 (24-h)               | Max (24-h)                           |                                      |                       |           |
| Excellent                      | 0–25                                | 0–5                     | 0–10                    | 0–10                                 |                                      |                       |           |
| Very good                      | 26–50                               | 6–10                    | 11–20                   | 21–50                                |                                      |                       |           |
| Good                           | 51–70                               | 11–15                   | 21–30                   | 51–70                                |                                      |                       |           |
| Adequate                       | 71–120                              | 16–25                   | 31–40                   | 71–120                               |                                      |                       |           |
| Medium                         | 121–160                             | 26–35                   | 41–50                   | 121–150                              |                                      |                       |           |
| Poor                           | 161–180                             | 36–40                   | 51–60                   | 151–180                              |                                      |                       |           |
| Very poor                      | 181–240                             | 41–50                   | 61–70                   | 181–200                              |                                      |                       |           |
| Bad                            | 241–280                             | 51–60                   | 71–80                   | 201–250                              |                                      |                       |           |
| Very bad                       | 281–320                             | 61–70                   | 81–100                  | 251–300                              |                                      |                       |           |
| Execrable                      | >320                                | >70                     | >100                    | >300                                 |                                      |                       |           |

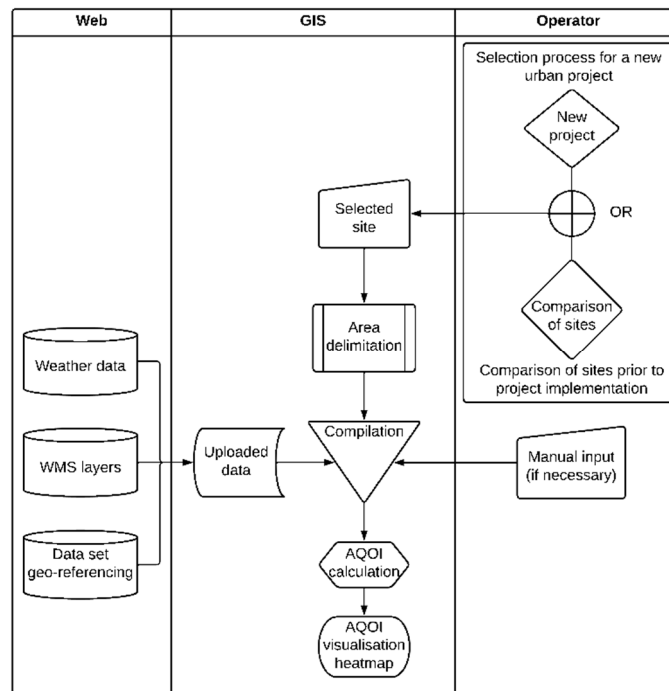

Figure S1. Flow scheme of the AQOI calculation with a GIS.

Table S2. Descriptor for “Assignment” variable used in Belgium.

|                         |                              |                    |
|-------------------------|------------------------------|--------------------|
| “Annex”                 | “Administration”             | “School”           |
| “Castel”                | “Building”                   | “Prison”           |
| “Water tower”           | “Shop”                       | “Fire station”     |
| “Water treatment plant” | “Culture/sport/hobby center” | “Train station”    |
| “Habitation”            | “Community house”            | “Hospital”         |
| “Nursing home”          | “Police”                     | “Industrial plant” |
| “Gas station”           |                              |                    |

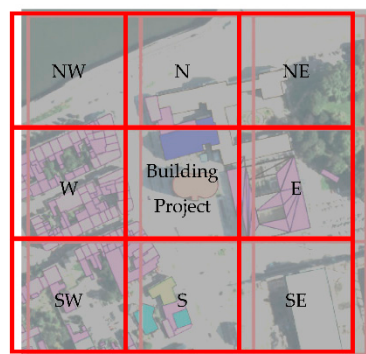

Figure S2. IC divided into nine s-IC with, in its center, the building project; names of the different s-IC refer to the cardinal points to the building project.

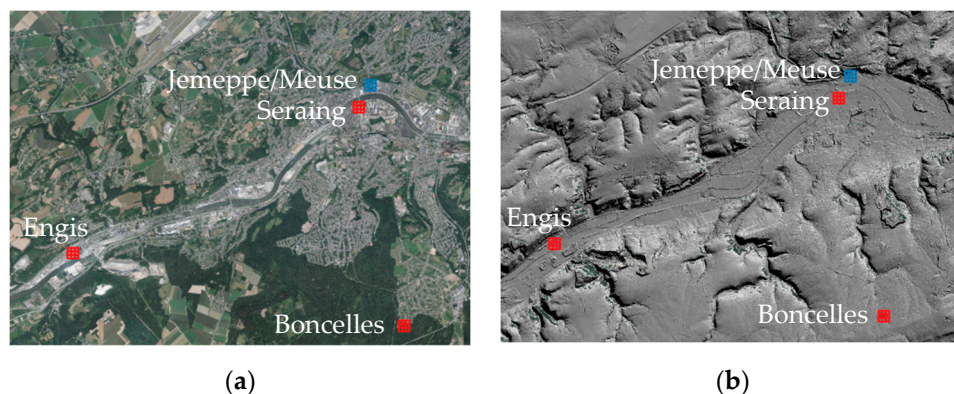

**Figure S3.** Situation of Seraing, Engis, Jemeppe/Meuse, and Bonnelles (data Source: Service public de Wallonie—<http://geoportail.wallonie.be> (accessed on 30 September 2019). Visualization with QGIS V3.16.7).

**Table S3.** Minimum and maximum parameter values.

| Parameters                    | Minimum (best case) | Maximum (worst case) |
|-------------------------------|---------------------|----------------------|
| <i>Topography (Tp)</i>        | −1.0                | 2.0                  |
| <i>Building (Bp)</i>          | −4.2                | 1.0                  |
| <i>Road (Rp)</i>              | 0.0                 | 11.8                 |
| <i>Vegetation (Vp)n</i>       | −1.3                | 1.8                  |
| <i>External sources (ESp)</i> | 0.0                 | 15.0                 |

**Table S4.** Parameters and AQOI values for each site.

| Parameters                    | Seraing       | Jemeppe/Meuse | Engis         | Bonnelles     |
|-------------------------------|---------------|---------------|---------------|---------------|
| <i>Topography (Tp)</i>        | 0.7226        | 0.6667        | 0.7098        | 0             |
| <i>Building (Bp)</i>          | 0.8291        | 0.1204        | 0.2039        | 0.035         |
| <i>Road (Rp)</i>              | 0.883         | 0.8703        | 0.9195        | 0.8391        |
| <i>Vegetation (Vp)</i>        | 0.4195        | 0.3655        | 0.4226        | 0.346         |
| <i>External sources (ESp)</i> | 0.2294        | 0.1802        | 0.9516        | 0.1374        |
| <b>AQOI</b>                   | <b>3.0836</b> | <b>2.2031</b> | <b>3.2074</b> | <b>1.3575</b> |

**Table S5.** Impact factor calculated for Engis following Equation (18). Values of BelAQI index; RR value represents the increase in daily mortality from 0 µg/m<sup>3</sup> concentration (%); the frequency of the index is repeated for each year.

| BelAQI        | RR (%) | 2013 | 2014 | 2015 | 2016 | 2017 | 2018 | 2019 |
|---------------|--------|------|------|------|------|------|------|------|
| 1             | 0      | 0    | 0    | 0    | 0    | 0    | 0    | 0    |
| 2             | 0.615  | 15   | 7    | 25   | 33   | 19   | 17   | 37   |
| 3             | 1.23   | 95   | 116  | 111  | 114  | 99   | 100  | 107  |
| 4             | 1.845  | 144  | 154  | 141  | 156  | 181  | 164  | 159  |
| 5             | 3.075  | 52   | 47   | 50   | 38   | 39   | 51   | 34   |
| 6             | 4.305  | 30   | 14   | 15   | 10   | 13   | 14   | 7    |
| 7             | 4.92   | 11   | 9    | 8    | 10   | 6    | 14   | 8    |
| 8             | 6.15   | 10   | 7    | 8    | 0    | 6    | 3    | 9    |
| 9             | 7.38   | 7    | 4    | 4    | 1    | 2    | 2    | 2    |
| 10            | 8.61   | 1    | 5    | 2    | 0    | 0    | 0    | 2    |
| <i>Impact</i> |        | 305  | 220  | 200  | 100  | 137  | 162  | 157  |

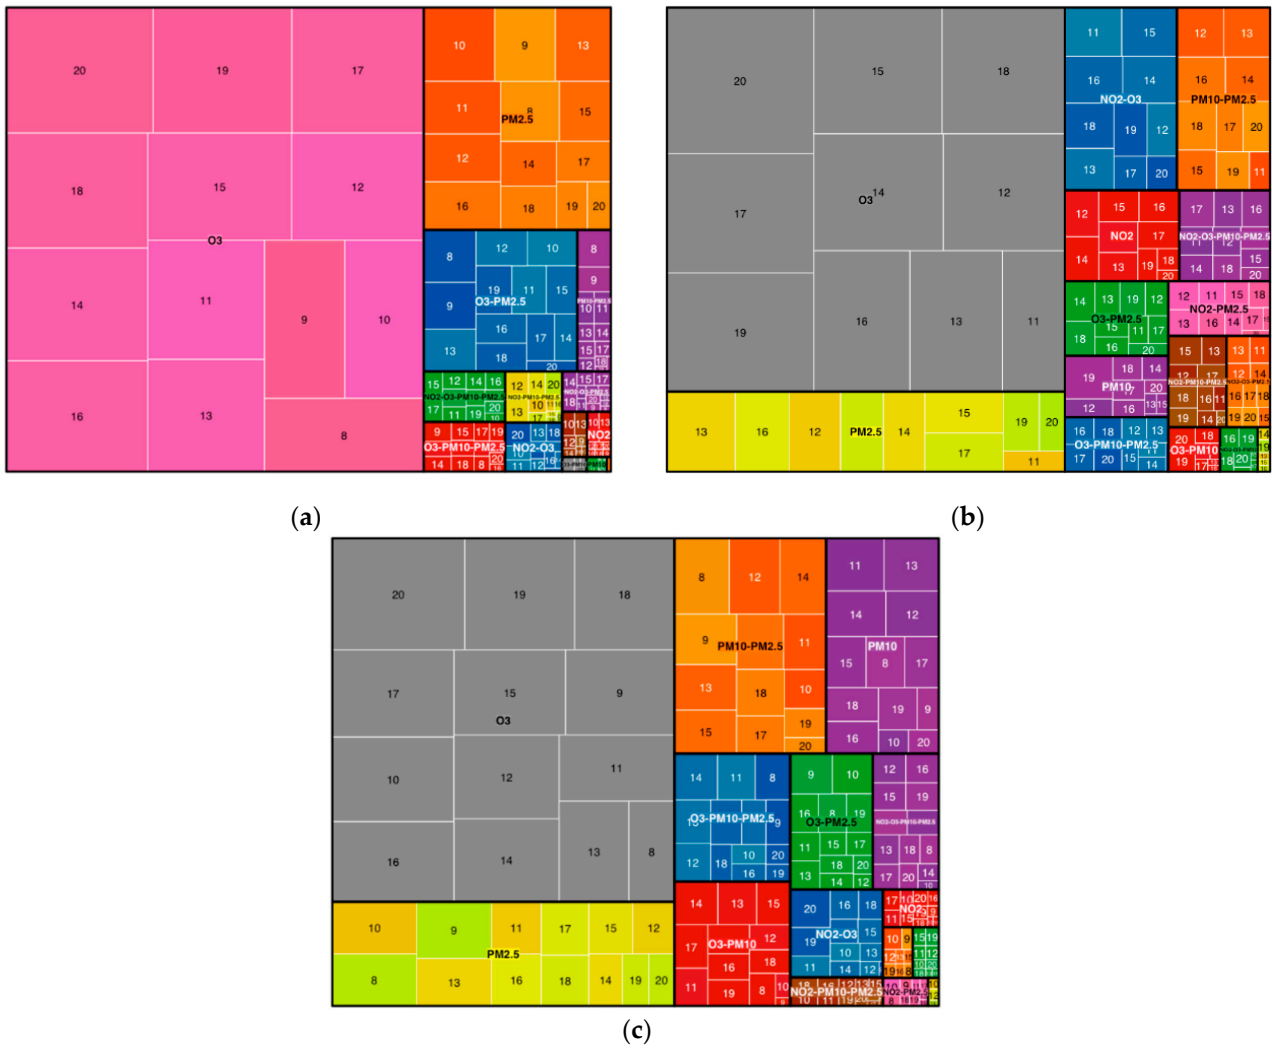

**Figure S4.** Pollutants responsible for the index according to the BelAQI calculation method. The colored areas show the presence of the pollutant responsible, and the subdivisions represent the years (e.g., pink 20 for (a) = occurrence of O<sub>3</sub> in 2020). (a) Habay air quality stations (2008 to 2020); (b) Val Benoit air quality station (2011 to 2020); (c) Engis air quality station (2008 to 2020).
